# Supplementary material for: Global and local drivers of Echinococcus multilocularis infection in the western Balkan region
Source: PubMed Central journal article supplement (PMC10692075; doi:10.1038/s41598-023-46632-9), 2023-12-01
Supplement: 41598_2023_46632_MOESM7_ESM.pdf [file 41598_2023_46632_MOESM7_ESM.pdf]

## Global and local drivers of *Echinococcus multilocularis* infection in the western Balkan region

Sibusiso Moloi, Tamás Tari, Tibor Halász, Bence Gallai, Gábor Nagy, Ágnes Cshivincsik

**Table S1.** Hunting bag statistics of the studied areas (Baranya County and Somogy County) and Hungary.

|              | Hungary                               |                                   | Baranya County                       |                                   | Somogy County                        |                                   |
|--------------|---------------------------------------|-----------------------------------|--------------------------------------|-----------------------------------|--------------------------------------|-----------------------------------|
| total area   | 93030 km <sup>2</sup>                 |                                   | 4430 km <sup>2</sup>                 |                                   | 6065 km <sup>2</sup>                 |                                   |
| hunting year | jackal*<br>(animals/km <sup>2</sup> ) | fox<br>(animals/km <sup>2</sup> ) | jackal<br>(animals/km <sup>2</sup> ) | fox<br>(animals/km <sup>2</sup> ) | jackal<br>(animals/km <sup>2</sup> ) | fox<br>(animals/km <sup>2</sup> ) |
| 2013         | 1813<br>(0.02)                        | 59745<br>(0.64)                   | 452<br>(0.1)                         | 2477<br>(0.56)                    | 650<br>(0.11)                        | 2516<br>(0.41)                    |
| 2014         | 2535<br>(0.03)                        | 73333<br>(0.79)                   | 511<br>(0.12)                        | 2620<br>(0.59)                    | 946<br>(0.16)                        | 2656<br>(0.44)                    |
| 2015         | 3267<br>(0.04)                        | 70125<br>(0.75)                   | 707<br>(0.16)                        | 2947<br>(0.67)                    | 999<br>(0.16)                        | 2557<br>(0.42)                    |
| 2016         | 4225<br>(0.05)                        | 69111<br>(0.74)                   | 785<br>(0.18)                        | 2722<br>(0.61)                    | 1441<br>(0.24)                       | 2876<br>(0.47)                    |
| 2017         | 5831<br>(0.06)                        | 72694<br>(0.78)                   | 1043<br>(0.24)                       | 3168<br>(0.72)                    | 1668<br>(0.28)                       | 2965<br>(0.49)                    |
| 2018         | 7873<br>(0.08)                        | 82687<br>(0.89)                   | 1502<br>(0.34)                       | 3041<br>(0.69)                    | 2069<br>(0.34)                       | 3984<br>(0.66)                    |
| 2019         | 11283<br>(0.12)                       | 91285<br>(0.98)                   | 2014<br>(0.45)                       | 2646<br>(0.6)                     | 3378<br>(0.56)                       | 5766<br>(0.95)                    |
| 2020         | 12126<br>(0.13)                       | 89439<br>(0.96)                   | 2036<br>(0.46)                       | 2882<br>(0.65)                    | 2936<br>(0.48)                       | 4328<br>(0.71)                    |
| 2021         | 12620<br>(0.14)                       | 88696<br>(0.95)                   | 2033<br>(0.46)                       | 2625<br>(0.59)                    | 2710<br>(0.45)                       | 4201<br>(0.69)                    |
| 2022         | 14831<br>(0.16)                       | 84537<br>(0.91)                   | 2092<br>(0.47)                       | 2736<br>(0.62)                    | 3225<br>(0.53)                       | 4253<br>(0,7)                     |

\*annual hunting bag of the particular year, the parenthic number indicates the hunting bag density (harvested animals/km<sup>2</sup>)
