# Supplementary material for: Global and local drivers of Echinococcus multilocularis infection in the western Balkan region
Source: PubMed Central journal article supplement (PMC10692075; doi:10.1038/s41598-023-46632-9), 2023-12-01
Supplement: 41598_2023_46632_MOESM8_ESM.pdf [file 41598_2023_46632_MOESM8_ESM.pdf]

Global and local drivers of Echinococcus multilocularis infection in the western Balkan region

Sibusiso Moloi, Tamás Tari, Tibor Halász, Bence Gallai, Gábor Nagy, Ágnes Csivincsik

Table S2. Detailed results of the global (OLS) and local (GWR and MGWR) models.

MGWR Version: 2.2.1  
Released on: 03/20/2020

```

=====
Model type: Gaussian
Number of observations: 87
Number of covariates: 9
Dependent variable: EmPREV
Variable standardization: On
=====

```

Global Regression Results

```

-----
Residual sum of squares: 72.775
Log-likelihood: -115.681
AIC: 249.362
AICc: 254.257
R2: 0.164
Adj. R2: 0.078

```

| Variable  | Est.   | SE    | t(Est/SE) | p-value |
|-----------|--------|-------|-----------|---------|
| Intercept | -0.000 | 0.104 | -0.000    | 1.000   |
| GRASS     | 0.021  | 0.109 | 0.192     | 0.848   |
| WET       | 0.391  | 0.142 | 2.752     | 0.006   |
| AGRO      | -0.036 | 0.121 | -0.296    | 0.767   |
| WATER     | 0.065  | 0.122 | 0.532     | 0.595   |
| PATCH     | 0.097  | 0.119 | 0.817     | 0.414   |
| MAP       | 0.092  | 0.187 | 0.494     | 0.621   |
| PPT_SY    | -0.096 | 0.165 | -0.579    | 0.563   |
| MAT       | -0.093 | 0.153 | -0.609    | 0.543   |

Geographically Weighted Regression (GWR) Results

```

-----
Coordinates type: Projected
Spatial kernel: Adaptive bisquare
Criterion for optimal bandwidth: AICc
Bandwidth used: 78.000
Bandwidth confidence interval (95%): (69.0, 80.0)

```

Diagnostic Information

```

-----
Residual sum of squares: 43.569
Effective number of parameters (trace(S)): 17.017

```

Degree of freedom (n - trace(S)): 69.983  
 Sigma estimate: 0.789  
 Log-likelihood: -93.365  
 Degree of Dependency (DoD): 0.857  
 AIC: 222.764  
 AICc: 232.843  
 BIC: 267.191  
 R2: 0.499  
 Adj. R2: 0.376  
 Adj. alpha (95%): 0.026  
 Adj. critical t value (95%): 2.259

Monte Carlo Test for Spatial Variability

| Variable  | p-value |
|-----------|---------|
| Intercept | 0.243   |
| GRASS     | 0.205   |
| WET       | 0.586   |
| AGRO      | 0.287   |
| WATER     | 0.007   |
| PATCH     | 0.323   |
| MAP       | 0.003   |
| PPT_SY    | 0.000   |
| MAT       | 0.290   |

Summary Statistics For GWR Parameter Estimates

| Variable  | Mean   | STD   | Min    | Median | Max    |
|-----------|--------|-------|--------|--------|--------|
| Intercept | -0.179 | 0.067 | -0.417 | -0.183 | -0.063 |
| GRASS     | 0.126  | 0.088 | -0.027 | 0.139  | 0.261  |
| WET       | 0.173  | 0.082 | 0.057  | 0.150  | 0.306  |
| AGRO      | 0.043  | 0.063 | -0.066 | 0.052  | 0.141  |
| WATER     | 0.119  | 0.225 | -0.095 | -0.009 | 0.556  |
| PATCH     | 0.135  | 0.081 | -0.007 | 0.124  | 0.282  |
| MAP       | 0.231  | 0.546 | -0.690 | 0.334  | 1.065  |
| PPT_SY    | -0.218 | 0.499 | -0.981 | -0.346 | 0.551  |
| MAT       | -0.182 | 0.113 | -0.391 | -0.143 | -0.048 |

Multiscale Geographically Weighted Regression (MGWR) Results

Coordinates type: Projected  
 Spatial kernel: Adaptive bisquare  
 Criterion for optimal bandwidth: AICc  
 Score of change (SOC) type: Smoothing f  
 Termination criterion for MGWR: 1.0e-05  
 Number of iterations used: 34

MGWR bandwidths

| Variable  | Bandwidth | ENP_j | Adj t-val(95%) | DoD_j |
|-----------|-----------|-------|----------------|-------|
| Intercept | 85.000    | 1.077 | 2.020          | 0.983 |
| GRASS     | 67.000    | 2.614 | 2.388          | 0.785 |
| WET       | 70.000    | 2.244 | 2.328          | 0.819 |

|        |        |       |       |       |
|--------|--------|-------|-------|-------|
| AGRO   | 81.000 | 1.592 | 2.188 | 0.896 |
| WATER  | 74.000 | 2.424 | 2.358 | 0.802 |
| PATCH  | 62.000 | 2.206 | 2.321 | 0.823 |
| MAP    | 70.000 | 2.204 | 2.320 | 0.823 |
| PPT_SY | 74.000 | 2.042 | 2.290 | 0.840 |
| MAT    | 72.000 | 2.249 | 2.328 | 0.819 |

Bandwidth Confidence Intervals (95%)

|           |              |
|-----------|--------------|
| Intercept | (59.0, 85.0) |
| GRASS     | (59.0, 76.0) |
| WET       | (59.0, 76.0) |
| AGRO      | (59.0, 83.0) |
| WATER     | (59.0, 81.0) |
| PATCH     | (53.0, 70.0) |
| MAP       | (59.0, 76.0) |
| PPT_SY    | (59.0, 81.0) |
| MAT       | (59.0, 76.0) |

Monte Carlo Test for Spatial Variability

|           |         |
|-----------|---------|
| Variable  | p-value |
| Intercept | 0.915   |
| GRASS     | 0.418   |
| WET       | 0.711   |
| AGRO      | 0.623   |
| WATER     | 0.135   |
| PATCH     | 0.247   |
| MAP       | 0.008   |
| PPT_SY    | 0.014   |
| MAT       | 0.414   |

Diagnostic Information

|                                            |         |
|--------------------------------------------|---------|
| Residual sum of squares:                   | 39.509  |
| Effective number of parameters (trace(S)): | 18.651  |
| Degree of freedom (n - trace(S)):          | 68.349  |
| Sigma estimate:                            | 0.760   |
| Log-likelihood:                            | -89.110 |
| Degree of Dependency (DoD):                | 0.837   |
| AIC:                                       | 217.521 |
| AICc:                                      | 229.754 |
| BIC:                                       | 265.979 |
| R2:                                        | 0.546   |
| Adj. R2:                                   | 0.420   |

Summary Statistics For MGWR Parameter Estimates

| Variable  | Mean   | STD   | Min    | Median | Max    |
|-----------|--------|-------|--------|--------|--------|
| Intercept | -0.273 | 0.019 | -0.292 | -0.279 | -0.210 |
| GRASS     | 0.116  | 0.137 | -0.088 | 0.158  | 0.285  |
| WET       | 0.175  | 0.098 | 0.068  | 0.126  | 0.428  |
| AGRO      | 0.090  | 0.027 | 0.041  | 0.094  | 0.162  |
| WATER     | 0.072  | 0.203 | -0.092 | -0.040 | 0.567  |

|        |        |       |        |        |       |
|--------|--------|-------|--------|--------|-------|
| PATCH  | 0.130  | 0.146 | -0.149 | 0.165  | 0.401 |
| MAP    | 0.285  | 0.391 | -0.398 | 0.491  | 0.745 |
| PPT_SY | -0.211 | 0.271 | -0.483 | -0.381 | 0.241 |
| MAT    | -0.187 | 0.062 | -0.288 | -0.190 | 0.005 |
| =====  |        |       |        |        |       |
