# Supplementary material for: Global and local drivers of Echinococcus multilocularis infection in the western Balkan region
Source: PubMed Central journal article supplement (PMC10692075; doi:10.1038/s41598-023-46632-9), 2023-12-01
Supplement: 41598_2023_46632_MOESM9_ESM.pdf [file 41598_2023_46632_MOESM9_ESM.pdf]

## Global and local drivers of *Echinococcus multilocularis* infection in the western Balkan region

Sibusiso Moloj, Tamás Tari, Tibor Halász, Bence Gallai, Gábor Nagy, Ágnes Csivincsik

**Table S3.** Location of the studied UTM grid cells.

| UTM_GRID | latitude* | longitude | number of hosts |
|----------|-----------|-----------|-----------------|
| xm71d2   | 46.130597 | 17.280326 | 3               |
| xm73c4   | 46.355458 | 17.323248 | 2               |
| xm80a2   | 46.085231 | 17.343892 | 5               |
| xm81a1   | 46.197382 | 17.349564 | 2               |
| xm81b2   | 46.129426 | 17.345775 | 4               |
| xm81d1   | 46.151165 | 17.409486 | 2               |
| xm82b1   | 46.241823 | 17.351142 | 2               |
| xm82c3   | 46.284757 | 17.449853 | 2               |
| xm82d4   | 46.217541 | 17.446445 | 3               |
| xm83a1   | 46.376523 | 17.356098 | 2               |
| xm83a2   | 46.354768 | 17.354387 | 2               |
| xm83d4   | 46.308085 | 17.451164 | 3               |
| xm91a2   | 46.171550 | 17.476595 | 3               |
| xm91b3   | 46.149035 | 17.507817 | 4               |
| xm92a1   | 46.284538 | 17.483479 | 2               |
| xm92a2   | 46.261904 | 17.480545 | 4               |
| xm92a4   | 46.261166 | 17.513438 | 2               |
| xm92b4   | 46.215812 | 17.512859 | 3               |
| xm95c4   | 46.529061 | 17.590123 | 3               |
| xm97c3   | 46.732053 | 17.600761 | 3               |
| yl17c1   | 45.827100 | 17.783100 | 6               |
| yl17c3   | 45.824550 | 17.815893 | 3               |
| yl17c4   | 45.802450 | 17.814579 | 4               |
| yl27a1   | 45.825852 | 17.848744 | 30              |
| yl27a2   | 45.800649 | 17.846053 | 17              |
| yl27a4   | 45.802459 | 17.876957 | 4               |
| ym00a1   | 46.102110 | 17.602880 | 4               |
| ym01a1   | 46.192548 | 17.606969 | 2               |
| ym01b1   | 46.146539 | 17.605943 | 4               |
| ym02a1   | 46.281460 | 17.610678 | 4               |
| ym02a3   | 46.280783 | 17.643675 | 12              |
| ym02a4   | 46.257872 | 17.642646 | 4               |
| ym02c2   | 46.256928 | 17.673887 | 4               |
| ym03a2   | 46.349853 | 17.615964 | 5               |
| ym03b1   | 46.326571 | 17.612941 | 3               |
| ym03b3   | 46.325157 | 17.645349 | 19              |
| ym03b4   | 46.302810 | 17.643527 | 2               |

|        |           |           |    |
|--------|-----------|-----------|----|
| ym03d1 | 46.324823 | 17.677911 | 9  |
| ym03d2 | 46.303062 | 17.676334 | 7  |
| ym03d4 | 46.301708 | 17.709049 | 2  |
| ym04c2 | 46.436707 | 17.683959 | 4  |
| ym04c4 | 46.435339 | 17.714746 | 2  |
| ym04d1 | 46.414685 | 17.682290 | 3  |
| ym05a1 | 46.551538 | 17.623749 | 2  |
| ym06c2 | 46.617524 | 17.692199 | 2  |
| ym07a3 | 46.730747 | 17.665361 | 2  |
| ym07d4 | 46.661679 | 17.726490 | 3  |
| ym08b4 | 46.751415 | 17.667551 | 2  |
| ym11a1 | 46.188165 | 17.736304 | 2  |
| ym11a3 | 46.186749 | 17.769539 | 9  |
| ym12a1 | 46.278195 | 17.740529 | 4  |
| ym12a2 | 46.256407 | 17.739474 | 5  |
| ym12a3 | 46.277965 | 17.772561 | 4  |
| ym12a4 | 46.254705 | 17.772037 | 3  |
| ym12b3 | 46.232670 | 17.771289 | 3  |
| ym12c1 | 46.276883 | 17.806004 | 5  |
| ym12c2 | 46.254431 | 17.804759 | 3  |
| ym12c4 | 46.253506 | 17.836846 | 3  |
| ym12d2 | 46.209181 | 17.802748 | 7  |
| ym12d3 | 46.231101 | 17.835113 | 4  |
| ym12d4 | 46.208230 | 17.834751 | 5  |
| ym13b2 | 46.299240 | 17.740586 | 2  |
| ym13b3 | 46.321723 | 17.776977 | 2  |
| ym13c3 | 46.365553 | 17.842414 | 5  |
| ym13c4 | 46.343575 | 17.840910 | 2  |
| ym13d2 | 46.299083 | 17.806742 | 5  |
| ym13d3 | 46.320825 | 17.841428 | 2  |
| ym14d3 | 46.410685 | 17.844369 | 9  |
| ym14d4 | 46.388617 | 17.842796 | 2  |
| ym17b2 | 46.659971 | 17.760623 | 3  |
| ym17c1 | 46.725602 | 17.827682 | 4  |
| ym17c2 | 46.704145 | 17.827455 | 2  |
| ym17c3 | 46.726067 | 17.860498 | 12 |
| ym17c4 | 46.703658 | 17.860105 | 4  |
| ym18c4 | 46.793122 | 17.863664 | 3  |
| ym18d3 | 46.770939 | 17.862273 | 4  |
| ym23a1 | 46.365692 | 17.874263 | 4  |
| ym23a2 | 46.342135 | 17.873422 | 2  |
| ym24b2 | 46.387355 | 17.876209 | 7  |
| ym28a1 | 46.813893 | 17.899678 | 3  |
| ym28a3 | 46.813835 | 17.931235 | 3  |
| ym28b1 | 46.768737 | 17.895286 | 4  |
| ym28b2 | 46.746920 | 17.895041 | 2  |
| ym28c1 | 46.813325 | 17.964337 | 2  |
| ym28c2 | 46.790003 | 17.963437 | 6  |
| ym29b3 | 46.858749 | 17.934094 | 12 |

ym29b4

46.835194

17.932656

7

---

\* Latitude and longitude indicate of the central coordinate of UTM quadrate.
